# Supplementary material for: Influence of Hydrophobicity of Backbone Polymer in Thermo-Responsive Hydrogel with Immobilized Amine on Cycle Capacity for Absorption and Recovery of CO2
Source: MDPI journal article supplement (doi:10.3390/polym11061024), 2019-06-10
Supplement: s1 [file s1]

## Supporting Material

# Influence of Hydrophobicity of Backbone Polymer in Thermo-responsive Hydrogel with Immobilized Amine on Cycle Capacity for Absorption and Recovery of CO<sub>2</sub>

Yuma Nagasawa <sup>1</sup>, Yoshimi Seida <sup>2,\*</sup>, Takehiko Gotoh <sup>3</sup> and Eiji Furuya <sup>1</sup>

<sup>1</sup> Department of Applied Chemistry, Meiji University, 214-8571 Kawasaki, Japan; [n7y2u6@gmail.com](mailto:n7y2u6@gmail.com) (Y.N.); [egfuruya@meiji.ac.jp](mailto:egfuruya@meiji.ac.jp) (E.F.)

<sup>2</sup> Natural Science Laboratory, Toyo University, 112-8606 Tokyo, Japan

<sup>3</sup> Department of Chemical Engineering, Graduate School of Engineering, Hiroshima University, 739-8527 Higashi Hiroshima, Japan; [tgoto@hiroshima-u.ac.jp](mailto:tgoto@hiroshima-u.ac.jp)

\* Correspondence: [seida@toyo.jp](mailto:seida@toyo.jp); Tel.: +81-3-3945-4894

The CO<sub>2</sub> recovery performance of the gel system was roughly estimated referring to the process conditions of the existing process. The operating conditions of the gel system were determined based on the results obtained in this study. Using the adsorption model for the gel system constructed in this study, the amount of adsorbed CO<sub>2</sub> at each operating temperature was calculated. With reference to the cycle capacity obtained in this study, the  $pK_{a,g}$  at desorption temperature was determined. The heat requirement was determined based on the heat capacity of water in the slurry because heating and cooling water is the major energy consumption. In the calculation of adsorption amount in the gel system, the composition of gel No.12 was used. The swelling ratio of the gel was set to 1/5 of gel No.12. In the case of a solid adsorbent, moisture in the air is also adsorbed in the CO<sub>2</sub> adsorption process, and therefore, the latent heat of the adsorbed water is also required at the time of CO<sub>2</sub> desorption and regeneration of the adsorbent. Water is also recovered during the desorption process in the gel system, but the latent heat will be suppressed because it is an amount of water vapor corresponding to the saturated vapor pressure in the reactor. (ex.  $p_{CO_2}$ :  $p_{H_2O}$  = 0.75:0.25 at 343 K). The consumption of sensible heat for heating and cooling the entire slurry in the gel system increases depending on the water content of the slurry.

Table S1 Performance comparison

| Parameters                  |                                                 |                                                 |
|-----------------------------|-------------------------------------------------|-------------------------------------------------|
| Process                     | Temperature swing Gel system                    | Temperature- vacuum swing adsorption cycles [1] |
| Reactor Type                | Gas-Liquid contact reactor                      | Gas-Solid contact reactor                       |
| Reactor Volume              | 50                                              | 15.7                                            |
| Active material [kg/rector] | Thermoresponsive hydrogel                       |                                                 |
|                             | with immobilized amine<br>(3.5mmol amine/g gel) | Amine-functionalized polymer resin              |

|                                          |         |      |
|------------------------------------------|---------|------|
|                                          | 10      | 30   |
| Number of reactor                        | 8       | 8    |
| Cycle number per day                     | 4       | 1    |
| Heating requirement [K]                  | 343     | 353  |
| Cooling requirement [K]                  | 293     | 288  |
| Heat requirement [MJ/kg]                 | 105.9   | 27.3 |
| Electricity requirement [MJ/kg]          | no data | 19.5 |
| Feed CO <sub>2</sub> [ppm]               | 400     | 470  |
| CO <sub>2</sub> production [kg/d]        | 2.53    | 2.8  |
| Specific energy [MJ/kg-CO <sub>2</sub> ] | 105.9<  | 46.8 |

---

1. Bajamundi, C.J.E.; Koponen, J.; Ruuskanen, V.; Elfving, J.; Kosonen, A.; Kauppinen, J.; Ahola, J. Capturing CO<sub>2</sub> from air: Technical performance and process control improvement. *J. CO<sub>2</sub> Util.* **2019**, *30*, 232–239, doi:10.1016/j.jcou.2019.02.002.
